# Supplementary material
Source: Royal Society of Chemistry journal article supplement (doi:10.1039/d6gc01068g)
Supplement: d6gc01068g1.pdf [file d6gc01068g1.pdf]

## Supplementary Information

### **Development of efficient poly(3-hydroxybutyrate) production platform from lignocellulosic hydrolysates using a robust *Cupriavidus necator* RXI22 strain**

Habin Sun<sup>a,#</sup>, So Jeong Lee<sup>a,#</sup>, Hyun-Joong Kim<sup>a</sup>, Hyeongmin Seo<sup>b</sup>, Jeongchan Lee<sup>a</sup>, Jung Ho Ahn<sup>a,c</sup>, Gyeongtaek Gong<sup>a,c</sup>, Youngsoon Um<sup>a,c</sup>, Kyoung Heon Kim<sup>d</sup>, Ja Kyong Ko<sup>a,c,\*</sup>

<sup>a</sup> Clean Energy Research Center, Korea Institute of Science and Technology (KIST), Seoul 02792, Republic of Korea

<sup>b</sup> Department of Chemical and Biochemical Engineering, University of Iowa, Iowa City, Iowa 52242, United States

<sup>c</sup> Division of Energy and Environment Technology, KIST School, University of Science and Technology, Seoul 02792, Republic of Korea

<sup>d</sup> Department of Biotechnology, Korea University, Seoul 02841, Republic of Korea

\*Correspondance to Ja Kyong Ko: [jkko@kist.re.kr](mailto:jkko@kist.re.kr)

#These authors equally contributed to this work.

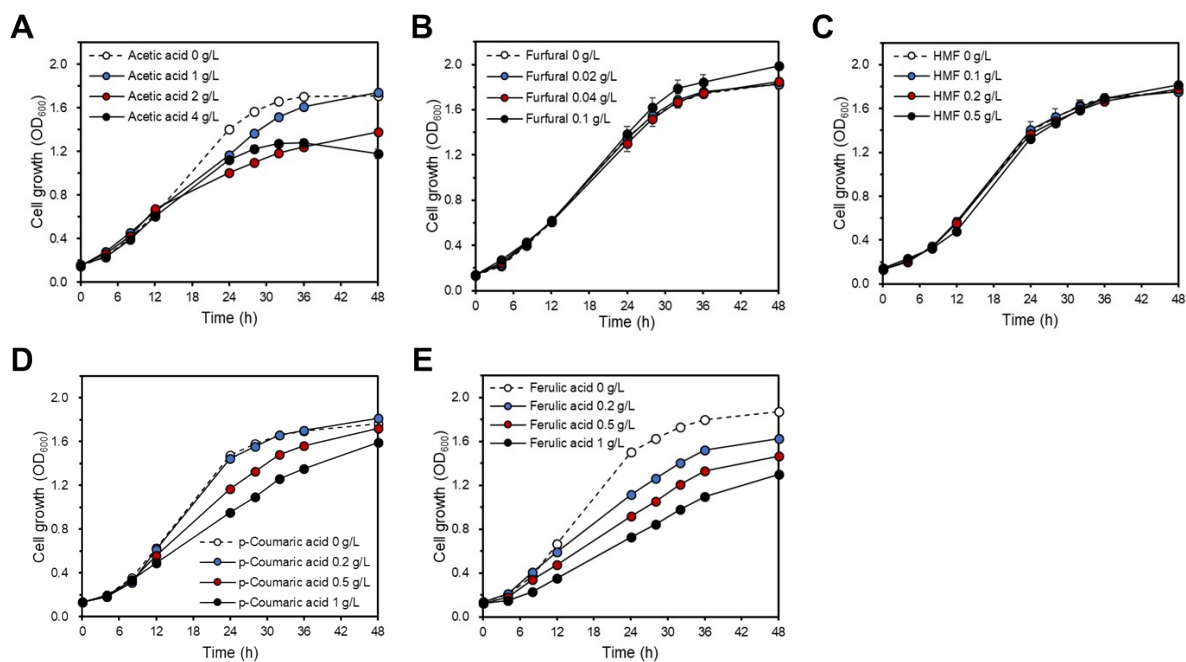

**Fig. S1** Growth effects of lignocellulosic hydrolysate-derived inhibitors under glucose-only conditions. *C. necator* RXI22 was cultivated in 96-well plates using glucose as the sole carbon source, and cell growth was monitored for 48 h in the presence of individual inhibitors at varying concentrations (0–4 g L<sup>-1</sup> acetic acid, 0–0.1 g L<sup>-1</sup> furfural, 0–0.5 g L<sup>-1</sup> HMF, 0–1 g L<sup>-1</sup> *p*-coumaric acid, and 0–1 g L<sup>-1</sup> ferulic acid). Data are presented as mean ± standard deviation of three biological replicates. Abbreviations: HMF, 5-hydroxymethylfurfural.

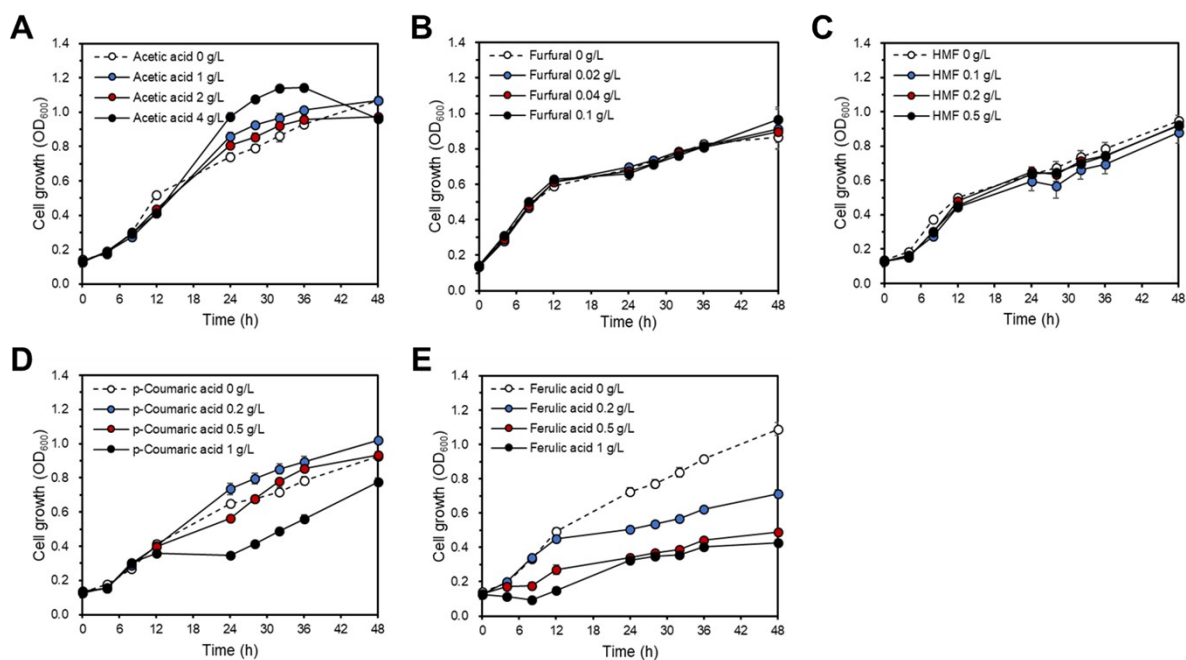

**Fig. S2** Growth effects of lignocellulosic hydrolysate-derived inhibitors under xylose-only conditions. *C. necator* RXI22 was cultivated in 96-well plates using xylose as the sole carbon source, and cell growth was monitored for 48 h in the presence of individual inhibitors at varying concentrations (0–4 g L<sup>-1</sup> acetic acid, 0–0.1 g L<sup>-1</sup> furfural, 0–0.5 g L<sup>-1</sup> HMF, 0–1 g L<sup>-1</sup> *p*-coumaric acid, and 0–1 g L<sup>-1</sup> ferulic acid). Data are presented as mean ± standard deviation of three biological replicates. Abbreviations: HMF, 5-hydroxymethylfurfural.

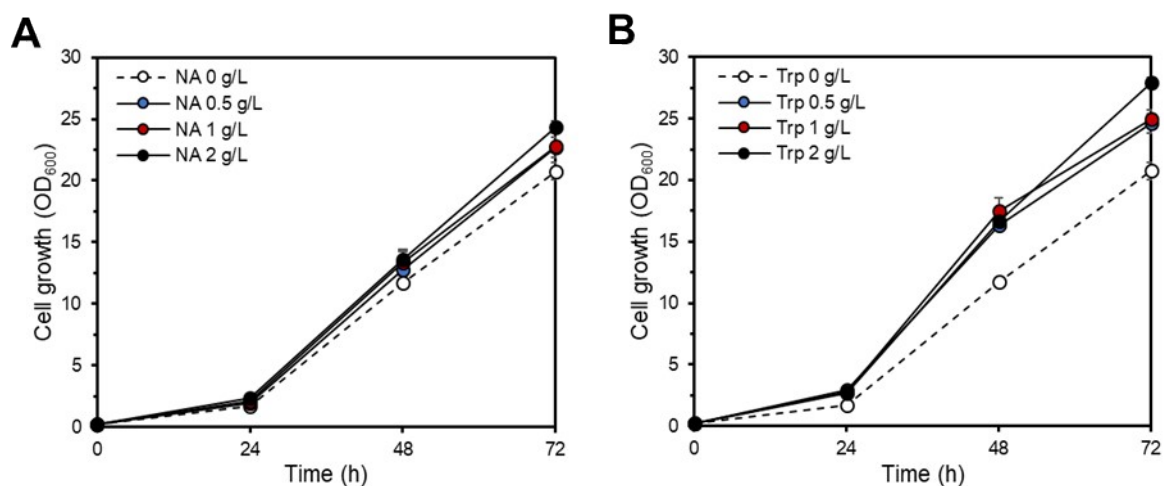

**Fig. S3** Effect of nicotinic acid or tryptophan supplementation on the growth of *C. necator* RXI22 under inhibitor-stressed mixed-sugar conditions. *C. necator* RXI22 was cultivated in culture tubes (working volume 3 mL) supplemented with a defined mixture of lignocellulosic hydrolysate-derived inhibitors and either (A) nicotinic acid or (B) tryptophan at final concentrations of 0, 0.5, 1, and 2 g L<sup>-1</sup>. The inhibitor mixture consisted of 1.5 g L<sup>-1</sup> acetic acid, 0.02 g L<sup>-1</sup> furfural, 0.5 g L<sup>-1</sup> HMF, and 0.5 g L<sup>-1</sup> ferulic acid, formulated to closely reproduce the fermentation performance observed in hydrolysate-based cultures. Data are presented as mean  $\pm$  standard deviation of three biological replicates. Abbreviations: NA, nicotinic acid; Trp, tryptophan.

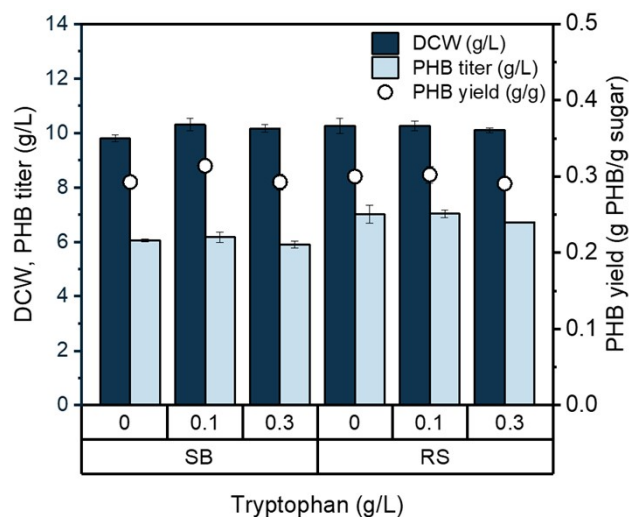

**Fig. S4.** Effect of tryptophan supplementation on the growth and PHB production of *C. necator* RXI22. The strain was grown in media containing either sugarcane bagasse hydrolysate or rice straw hydrolysate as the carbon source, supplemented with tryptophan (0–0.3 g L<sup>-1</sup>). Dry cell weight (DCW), PHB titer, and PHB yield were measured after 96 h of cultivation. Data are presented as mean ± standard deviation of three biological replicates. Abbreviations: SB, sugarcane bagasse; RS, rice straw.
